# Supplementary material for: Chondroitin sulfate proteoglycan serglycin influences protein cargo loading and functions of tumor-derived exosomes
Source: PubMed Central journal article supplement (PMC5650294; doi:10.18632/oncotarget.20564), 2017-08-27
Supplement: oncotarget-08-73723-s001.pdf [file oncotarget-08-73723-s001.pdf]

## Chondroitin sulfate proteoglycan serglycin influences protein cargo loading and functions of tumor-derived exosomes

### SUPPLEMENTARY MATERIALS

**Table 1: List of proteins involved in cell adhesion pathway that are absent in exosomes from serglycin knockdown myeloma cells.**

|                                                       |
|-------------------------------------------------------|
| CD44                                                  |
| Integrin alpha-4                                      |
| Integrin beta-1                                       |
| Poly(U)-binding-splicing factor PUF60                 |
| Septin-9                                              |
| Protein S100-A11                                      |
| ATP-dependent RNA helicase DDX3X                      |
| 14-3-3 protein zeta/delta                             |
| Protein DJ-1                                          |
| General vesicular transport factor p115               |
| 60S ribosomal protein L29                             |
| EH domain-containing protein 4                        |
| Eukaryotic translation initiation factor 2A           |
| Plectin                                               |
| Septin-2                                              |
| EH domain-containing protein 1                        |
| Plasminogen activator inhibitor 1 RNA-binding protein |

Gene ontology enrichment analysis was performed using DAVID (Database for Annotation, Visualization and Integrated Discovery) v6.8 to understand the biological role of proteins which were found to be exclusively absent in SRGN null exosomes compared to SRGN exosomes. Functional annotation chart was derived with default parameters [gene count of 2 and EASE of 0.1] and proteins involved in cell adhesion pathway that are absent in SRGN null exosomes compared to SRGN exosomes were identified ( $P$ -value <0.05).
